# Supplementary material for: Gene burden analysis identifies genes associated with increased risk and severity of adult-onset hearing loss in a diverse hospital-based cohort
Source: PLoS Genet. 2023 Jan 19;19(1):e1010584. doi: 10.1371/journal.pgen.1010584 (PMC9888707; doi:10.1371/journal.pgen.1010584)
Supplement: S6 Table — (XLSX) [file pgen.1010584.s006.xlsx]

## Sheet: ST6
Supplementary Table 6: LoF burden association results for 373 genes not previously reported as HL genes with at least 25 carriers
	Number >0 LoF carriers		Association with degree HL
Gene	HL2-4 (N=1100)	HL0-1/Phecode 0 (N=35,397)	Beta	SE	P-value	FDR
COL5A1	66	1189	0.05863	0.01412	3.31e-05	0.0123463
HMMR	28	379	0.09743	0.02448	6.89e-05	0.0128498
RAPGEF3	38	609	0.07307	0.01956	0.000188	0.0189297
NNT	52	961	0.05069	0.01364	0.000203	0.0189297
TECPR1	30	478	0.07015	0.02157	0.00114	0.085044
IQGAP2	31	732	0.0516	0.01801	0.00417	0.259235
RANBP2	27	572	0.05497	0.02009	0.00622	0.331437
FBP2	29	1470	-0.03412	0.01292	0.0083	0.386987
MFSD6L	27	534	0.05372	0.02105	0.0107	0.427255
SLC22A1	41	777	0.04365	0.01747	0.0125	0.427255
PMS2	47	1026	0.03773	0.01513	0.0126	0.427255
MYH14	46	1063	0.03645	0.01496	0.0148	0.450469
UNC13C	36	733	0.04325	0.0179	0.0157	0.450469
UBE3B	36	713	0.04241	0.01825	0.0201	0.489044
ALDH3B2	31	569	0.04654	0.02024	0.0215	0.489044
DNAH10	56	1164	0.0319	0.01423	0.025	0.489044
DNMT3A	33	745	-0.03959	0.01777	0.0259	0.489044
TPTE	27	633	0.04289	0.01938	0.0269	0.489044
SLC7A8	35	736	0.03938	0.01797	0.0284	0.489044
CC2D2B	30	592	0.04343	0.01985	0.0287	0.489044
PKLR	35	846	0.03603	0.0167	0.031	0.489044
RB1	29	599	0.04287	0.01992	0.0314	0.489044
CNTNAP3	43	1023	0.03261	0.01526	0.0327	0.489044
KCNJ12	45	1117	0.02991	0.014	0.0327	0.489044
MYH7B	95	3708	-0.01725	0.008113	0.0335	0.489044
ZNF717	28	537	0.04431	0.02095	0.0345	0.489044
KIF27	33	745	0.03769	0.01792	0.0354	0.489044
SEMA3D	36	704	0.03822	0.01836	0.0374	0.489873
CTH	26	567	0.04215	0.02046	0.0393	0.489873
MCCC2	29	554	0.04239	0.02058	0.0394	0.489873
ENTPD1-AS1	30	613	0.03924	0.01954	0.0446	0.531525
SLC26A5	39	1024	0.03048	0.01525	0.0456	0.531525
LOXHD1	33	788	0.03427	0.0174	0.0489	0.552718
KCNH6	55	1351	0.0252	0.01315	0.0553	0.606674
HMCN2	27	607	0.0364	0.01955	0.0626	0.630174
ASPM	28	1313	-0.02541	0.01365	0.0627	0.630174
CHAT	32	1566	-0.02301	0.01242	0.064	0.630174
SVOPL	28	534	0.0387	0.02091	0.0642	0.630174
TYRO3	66	1736	0.02029	0.01112	0.068	0.650359
PDHA2	50	1136	0.02527	0.01411	0.0733	0.67322
F11	27	448	0.04049	0.02266	0.074	0.67322
LRP2	112	3196	0.01522	0.008674	0.0793	0.693953
GPHN	40	967	0.02742	0.01566	0.08	0.693953
GJB2	58	1442	0.02241	0.01293	0.0831	0.704461
DNAH5	43	1005	0.02611	0.0152	0.0859	0.712016
ALPG	42	950	0.02672	0.01586	0.092	0.732104
NEURL1	31	616	0.03045	0.01811	0.0928	0.732104
NOTCH3	35	963	0.02598	0.01565	0.097	0.732104
STARD9	31	837	0.02816	0.01699	0.0975	0.732104
PNPLA7	65	1911	0.0189	0.01149	0.0999	0.732104
IGFN1	27	518	0.03488	0.02121	0.1001	0.732104
POTEH	38	1014	0.02379	0.01495	0.1116	0.759988
PROS1	29	778	0.0278	0.01755	0.1132	0.759988
PAPLN	36	847	0.02611	0.01668	0.1175	0.759988
GLDC	57	1571	0.01925	0.01232	0.118	0.759988
MACF1	31	765	0.02674	0.01728	0.1217	0.759988
MALRD1	30	678	0.02854	0.01874	0.1277	0.759988
CYP4F2	31	737	0.02742	0.01801	0.128	0.759988
PKD2L1	27	571	0.0309	0.02035	0.1288	0.759988
ACAD11	29	724	0.02719	0.01809	0.1328	0.759988
CHD1L	26	585	0.02988	0.01995	0.1342	0.759988
AMPD3	48	1231	0.02071	0.01384	0.1346	0.759988
ATM	31	687	0.02721	0.01835	0.1381	0.759988
AIPL1	26	608	0.02906	0.01967	0.1397	0.759988
MYH6	45	1674	-0.01756	0.01189	0.1399	0.759988
CACNA1A	28	657	0.02794	0.01898	0.141	0.759988
UGT1A	26	580	0.02891	0.01978	0.1439	0.759988
UGT1A8	26	580	0.02891	0.01978	0.1439	0.759988
MSH5	26	627	0.02847	0.01953	0.145	0.759988
NPC1L1	33	947	0.02321	0.01594	0.1455	0.759988
OBSCN	53	1921	-0.01637	0.01124	0.1455	0.759988
CP	29	748	0.02591	0.01785	0.1467	0.759988
KRT15	27	616	0.0282	0.0196	0.1503	0.767971
TMPRSS6	40	989	0.02191	0.01555	0.1588	0.800438
COL6A6	45	1056	0.02034	0.01466	0.1653	0.808512
SLC3A1	50	1209	0.01931	0.0141	0.1708	0.808512
MYO1A	58	1509	0.01698	0.01262	0.1784	0.808512
GBE1	27	632	0.02599	0.01937	0.1798	0.808512
PYGM	57	1455	0.01609	0.01205	0.1821	0.808512
GPRC6A	40	1033	0.0202	0.01525	0.1854	0.808512
HK3	30	1227	-0.01851	0.01401	0.1865	0.808512
TMC3	32	902	0.02173	0.01648	0.1873	0.808512
TMC3-AS1	32	902	0.02173	0.01648	0.1873	0.808512
FBN2	54	1337	0.01746	0.01335	0.1908	0.808512
DIAPH1	31	823	0.02204	0.01694	0.1934	0.808512
PCDHA6	60	2475	-0.01224	0.00942	0.1937	0.808512
PKHD1	38	1328	-0.0173	0.01336	0.1953	0.808512
CORO7	28	651	0.02472	0.01913	0.1962	0.808512
CACNA1H	46	1711	-0.01526	0.01187	0.1986	0.808512
MSH5-SAPCD1	27	678	0.02408	0.01881	0.2006	0.808512
CORO7-PAM16	28	654	0.02435	0.01909	0.202	0.808512
PCDHA3	68	2714	-0.01152	0.009031	0.2022	0.808512
TNNI3K	32	714	0.02282	0.01801	0.2053	0.808512
OGDHL	26	779	0.01982	0.01568	0.2062	0.808512
ABCC3	33	1305	-0.0171	0.01358	0.208	0.808512
PCDHA7	58	2393	-0.01199	0.009553	0.2093	0.808512
ATP13A5	27	995	-0.01923	0.01547	0.214	0.808512
EFHC1	31	902	0.02014	0.0163	0.2166	0.808512
PLOD3	27	947	-0.01962	0.01594	0.2184	0.808512
IDUA	38	1508	-0.01523	0.01242	0.2204	0.808512
PCDHA@	74	2879	-0.01073	0.008776	0.2215	0.808512
PCDHA1	74	2879	-0.01073	0.008776	0.2215	0.808512
SPTA1	31	735	0.02012	0.01676	0.2299	0.808512
PCDHA2	71	2795	-0.01064	0.00889	0.2315	0.808512
STAB2	30	797	0.02038	0.01706	0.2322	0.808512
LOC105378642	71	1996	0.01328	0.01112	0.2326	0.808512
PCDHA4	67	2662	-0.01084	0.009104	0.2337	0.808512
EXOSC8	36	922	0.01918	0.01612	0.2341	0.808512
CAPN9	30	745	0.021	0.01777	0.2373	0.812045
ANKRD36	42	1416	-0.01514	0.01304	0.2456	0.819844
MYO7B	49	1725	-0.01355	0.01184	0.2525	0.819844
ERCC6L2	27	779	0.02019	0.01772	0.2544	0.819844
SEC23B	63	1668	0.01363	0.012	0.256	0.819844
PHKB	45	1651	-0.01347	0.01199	0.261	0.819844
COL6A5	37	1441	-0.014	0.01255	0.2649	0.819844
PCDHA9	42	1598	-0.01326	0.01191	0.2655	0.819844
DMXL2	62	1824	0.01105	0.009987	0.2687	0.819844
PCDHGA4	73	2532	-0.01084	0.0098	0.2689	0.819844
RYR3	56	2178	-0.01159	0.01049	0.2689	0.819844
PCDHA10	40	1524	-0.01342	0.01223	0.2723	0.819844
PCDHA8	57	2273	-0.01077	0.009818	0.2728	0.819844
GBA	26	1027	-0.01652	0.01535	0.2817	0.819844
NUP153	30	667	0.01964	0.0184	0.2858	0.819844
PCDHB@	87	2253	0.01086	0.0102	0.2867	0.819844
PCDHA5	66	2590	-0.00982	0.009232	0.2875	0.819844
NPHP3	32	1147	-0.01535	0.01446	0.2884	0.819844
PCDHGB2	73	2513	-0.01042	0.009839	0.2894	0.819844
COL28A1	49	1927	-0.01187	0.01121	0.2899	0.819844
PAH	28	1020	-0.01626	0.01541	0.2911	0.819844
PIGN	26	807	0.01773	0.01696	0.2957	0.819844
SYNJ2	28	803	0.01812	0.01733	0.2958	0.819844
SLC5A10	37	965	0.01618	0.01555	0.2982	0.819844
TTN-AS1	70	2665	-0.009896	0.00957	0.3011	0.819844
ATAD3C	46	1116	0.01497	0.01448	0.3012	0.819844
DYSF	44	1746	-0.0123	0.01191	0.3019	0.819844
MYO15A	97	2948	0.009349	0.009095	0.304	0.819844
AMY2A	36	1240	-0.01437	0.01399	0.3043	0.819844
ATP2A3	27	1082	-0.01524	0.01495	0.3081	0.819844
LOC105371566	68	2103	0.01079	0.01076	0.3158	0.819844
SKA3	37	1110	0.01362	0.0136	0.3166	0.819844
LOC106627981	26	1014	-0.01541	0.01544	0.3181	0.819844
COL5A3	28	680	0.01854	0.01858	0.3185	0.819844
MYO18B	29	765	0.01762	0.01767	0.3185	0.819844
SLC5A4	36	991	0.01541	0.01548	0.3194	0.819844
SLC5A4-AS1	36	991	0.01541	0.01548	0.3194	0.819844
WDR36	50	1506	0.01256	0.01268	0.3221	0.819844
PCDHGB6	33	1200	-0.01393	0.01414	0.3247	0.819844
ABCD4	31	754	0.01735	0.01764	0.3253	0.819844
TYR	33	831	0.01646	0.01684	0.3284	0.822102
POLG	47	1767	-0.0113	0.0117	0.334	0.828889
ABCB4	39	1024	0.01435	0.01498	0.3382	0.828889
PCDHGB3	58	2064	-0.01029	0.01079	0.34	0.828889
AGA	26	836	-0.01617	0.01699	0.3413	0.828889
GCAT	45	1331	0.01285	0.01358	0.3439	0.828889
IGSF10	27	674	0.0176	0.01875	0.3479	0.828889
PCDHGA9	35	1248	-0.01301	0.01387	0.3483	0.828889
LTBP4	31	922	0.01503	0.01606	0.3494	0.828889
CFTR	116	3324	0.007243	0.007775	0.3516	0.828889
SACS	41	1661	-0.01111	0.01212	0.3593	0.828889
F5	37	947	0.01448	0.01588	0.3619	0.828889
MCPH1	29	1168	-0.009872	0.01093	0.3664	0.828889
PCDHGB1	76	2623	-0.008646	0.009608	0.3682	0.828889
LOC105447645	39	1064	0.01326	0.01494	0.3749	0.828889
KMT2C	53	1303	0.0118	0.01334	0.3762	0.828889
ADGRV1	26	730	0.01591	0.01802	0.3773	0.828889
ARL9	31	1126	-0.01262	0.01434	0.3787	0.828889
LOC105371777	29	972	-0.01345	0.01531	0.3796	0.828889
SCN9A	74	2050	0.009393	0.01079	0.3842	0.828889
KIF13B	32	867	0.01445	0.01661	0.3843	0.828889
HLA-DRB1	40	1250	0.01093	0.01256	0.3845	0.828889
SCN4A	58	1848	0.00973	0.01125	0.3873	0.828889
TG	30	814	0.01466	0.01701	0.3889	0.828889
GH-LCR	44	1443	0.0111	0.01293	0.3906	0.828889
ALDH1L1	30	770	0.0151	0.01765	0.3921	0.828889
MYH10	29	871	0.0142	0.01662	0.3928	0.828889
ABCA4	148	4818	0.006033	0.007109	0.3961	0.828889
PKHD1L1	71	2109	0.008992	0.01061	0.3969	0.828889
CLCN1	34	990	0.01306	0.01545	0.3982	0.828889
MGAM	66	1913	0.009179	0.0109	0.3996	0.828889
NDUFA10	38	1098	0.01246	0.01482	0.4002	0.828889
CAD	29	1074	-0.01249	0.01492	0.4026	0.828889
HGC6.3	27	720	0.01435	0.01738	0.4089	0.828889
HS6ST1	38	1117	0.01196	0.0145	0.4094	0.828889
LOC101929523	43	1196	0.01134	0.01376	0.4101	0.828889
ABCC12	76	2736	-0.007814	0.009526	0.4121	0.828889
MYO1C	49	1958	-0.009037	0.01109	0.4153	0.828889
MYH8	65	1977	-0.008963	0.01107	0.4181	0.828889
HGD	27	763	0.01444	0.01785	0.4186	0.828889
GALR2	26	788	0.01411	0.0175	0.42	0.828889
MYO10	32	907	0.01219	0.0154	0.4285	0.833616
ACAD10	33	1144	-0.00922	0.01165	0.4286	0.833616
GNPTAB	45	1449	0.01029	0.01301	0.4291	0.833616
PCCB	29	837	0.01223	0.01555	0.4316	0.834128
CYP4B1	38	1223	0.01113	0.01423	0.4341	0.834636
PCDHGB5	38	1303	-0.01056	0.01359	0.4372	0.836285
TSC2	28	1020	-0.0118	0.01539	0.4432	0.838308
DNAH3	60	1630	0.009313	0.01218	0.4443	0.838308
FRMD4B	26	1068	-0.01166	0.01527	0.445	0.838308
DDX11	44	1372	0.01013	0.01341	0.45	0.838511
FAM8A1	38	921	0.009857	0.01309	0.4514	0.838511
ATP1A4	46	1334	0.01005	0.0134	0.4535	0.838511
PCDHGA5	67	2259	-0.007728	0.01032	0.4541	0.838511
THBS2	43	1215	0.01008	0.01365	0.46	0.843526
MYH2	42	1195	0.01043	0.01417	0.4618	0.843526
CC2D2A	32	925	0.01181	0.01611	0.4636	0.843526
ABCA3	41	1219	0.01021	0.01407	0.4682	0.845106
FPGT-TNNI3K	37	888	0.01159	0.01599	0.469	0.845106
TENM2	29	895	0.01157	0.01619	0.4749	0.851624
KYAT3	31	1157	-0.009966	0.01433	0.4867	0.859817
CPS1	57	1913	-0.007809	0.01126	0.4879	0.859817
MYH3	39	1062	0.01033	0.01499	0.4908	0.859817
LRP1	45	1619	-0.008349	0.01216	0.4924	0.859817
G6PC2	27	871	-0.01143	0.01668	0.4931	0.859817
FBN3	125	3812	0.005504	0.008035	0.4933	0.859817
MYH11	28	918	-0.01088	0.01606	0.498	0.863972
CACNA1S	86	2568	0.006336	0.009589	0.5088	0.867734
SLC5A9	31	1141	-0.009584	0.01457	0.5107	0.867734
PLEC	51	1534	0.008175	0.01244	0.5112	0.867734
FOXM1	27	1039	-0.01004	0.01529	0.5115	0.867734
ABCA7	39	1294	-0.008944	0.01363	0.5118	0.867734
TTN	160	5511	-0.004332	0.006688	0.517	0.872584
FUT2	40	1128	0.009289	0.01453	0.5227	0.87823
LDLR	28	793	0.01088	0.01737	0.5311	0.880181
USH2A	35	1020	0.009497	0.01519	0.5317	0.880181
SLC5A2	36	872	0.01028	0.01647	0.5326	0.880181
WFS1	100	3097	0.005534	0.008884	0.5333	0.880181
AGL	33	1205	-0.008732	0.01413	0.5367	0.88189
LTBP1	29	1043	-0.009313	0.01516	0.5391	0.881949
FLNB	44	1684	-0.006857	0.01136	0.5463	0.8892
GANC	35	1185	-0.00863	0.01438	0.5483	0.8892
SLC26A4	78	2341	0.005883	0.01022	0.5648	0.909831
MYO7A	51	1580	0.007021	0.01223	0.5659	0.909831
MELTF	26	752	0.01013	0.01789	0.5714	0.911937
LOC106501713	29	964	-0.008871	0.0157	0.5721	0.911937
PCDHGA6	55	1894	-0.006268	0.01126	0.5776	0.91385
OCA2	41	1108	0.008116	0.0146	0.5782	0.91385
ROR2	40	1283	0.006483	0.01176	0.5813	0.91385
VWF	68	2263	-0.005663	0.01032	0.5831	0.91385
PRH1	26	1025	-0.008022	0.01476	0.5869	0.915957
MEP1A	51	1419	0.005277	0.00984	0.5917	0.9196
ITPR3	56	1734	0.006226	0.0118	0.5977	0.921735
ATP7B	45	1240	0.007265	0.01389	0.6009	0.921735
RYR2	27	1077	-0.0076	0.01458	0.6022	0.921735
CNGB3	31	1186	-0.007485	0.01446	0.6048	0.921735
POLN	32	944	0.008147	0.01583	0.6068	0.921735
PRH1-PRR4	27	1060	-0.007438	0.0145	0.6079	0.921735
SLC25A41	36	1106	0.007498	0.01474	0.6109	0.922533
LAMA2	30	1034	-0.007553	0.01515	0.6182	0.925935
MYH1	67	1839	0.005309	0.01069	0.6194	0.925935
LRP1B	67	2131	0.005203	0.01051	0.6206	0.925935
MSH4	26	748	0.008679	0.01783	0.6263	0.930717
MYOF	27	918	-0.007693	0.01611	0.6331	0.934711
MLH1	31	934	0.005975	0.01255	0.634	0.934711
C16orf58	34	814	0.007781	0.01693	0.6457	0.939646
KRT86	36	1145	-0.006628	0.01449	0.6473	0.939646
TRAP1	50	1735	-0.005368	0.01189	0.6517	0.939646
ABCA1	29	820	0.007656	0.01703	0.653	0.939646
TRH	31	951	0.007192	0.016	0.653	0.939646
SLC12A1	26	789	0.007842	0.01751	0.6542	0.939646
PCDHGA7	53	1812	-0.00512	0.01153	0.657	0.939646
RYR1	118	3893	-0.003339	0.007531	0.6575	0.939646
LAMA5	35	1139	-0.006371	0.01454	0.6614	0.941611
TENM4	29	955	-0.006751	0.0158	0.6692	0.94548
ATP12A	54	1716	0.004334	0.01039	0.6766	0.94548
UNC13B	31	1054	-0.006228	0.01497	0.6773	0.94548
MYH13	55	1842	-0.00468	0.01139	0.681	0.94548
ATAD3B	36	1487	-0.0052	0.01274	0.6832	0.94548
LOC107984363	26	725	0.007274	0.018	0.6862	0.94548
B4GALNT1	27	717	0.007275	0.01803	0.6867	0.94548
BCO2	36	1236	-0.005617	0.014	0.6883	0.94548
CACNA1E	30	951	-0.005824	0.01461	0.6901	0.94548
PCDHG@	109	3219	0.003447	0.008702	0.692	0.94548
PCDHGA1	109	3219	0.003447	0.008702	0.692	0.94548
GJD3	32	1100	-0.005166	0.01342	0.7003	0.946016
DNAH12	54	1761	0.00441	0.01171	0.7065	0.946016
ABCA13	96	2792	0.003339	0.008896	0.7074	0.946016
MMEL1	27	910	-0.006008	0.01626	0.7117	0.946016
MYO5B	28	924	0.005884	0.0161	0.7148	0.946016
KCNG4	30	1247	-0.005112	0.01402	0.7153	0.946016
HADH	27	926	0.005876	0.01616	0.7161	0.946016
NOTCH4	28	1105	-0.005358	0.01483	0.718	0.946016
SCUBE2	26	986	-0.005629	0.01562	0.7185	0.946016
SCN10A	53	1704	-0.004162	0.01156	0.7189	0.946016
SCN5A	47	1353	0.004662	0.01324	0.7247	0.946016
PCDHGB4	52	1744	-0.004131	0.01174	0.7249	0.946016
ADAMTS15	33	1057	0.00528	0.01513	0.7271	0.946016
CNGB1	36	1112	0.005125	0.01473	0.7279	0.946016
GOLGA6L10	41	1316	0.004743	0.01393	0.7334	0.948762
HAL	34	1027	0.005157	0.01524	0.7351	0.948762
CPT2	44	1308	0.004408	0.01342	0.7427	0.950895
MC1R	38	1254	-0.004537	0.01388	0.7439	0.950895
CLCNKB	30	968	-0.005108	0.01567	0.7444	0.950895
SLC26A10	46	1582	-0.003886	0.0123	0.7521	0.956337
OTOF	52	1441	0.003993	0.01287	0.7564	0.956337
BDH2	36	1183	0.00438	0.01431	0.7596	0.956337
SASH1	26	890	0.004923	0.0164	0.764	0.956337
HMCN1	68	2238	0.00313	0.01043	0.7641	0.956337
CLDN20	30	841	0.004963	0.01685	0.7683	0.956337
CASC1	65	2419	-0.002228	0.007634	0.7704	0.956337
HKDC1	59	2132	-0.003148	0.01079	0.7704	0.956337
MYH4	70	2260	-0.002695	0.009341	0.773	0.956337
MYO5C	34	1050	0.004363	0.01522	0.7743	0.956337
FER1L6-AS2	30	897	-0.004573	0.01631	0.7792	0.959213
PKP4	33	915	0.004363	0.01617	0.7873	0.959473
DNA2	38	1173	0.003903	0.01449	0.7876	0.959473
PCDHGA8	51	1699	-0.003174	0.01189	0.7895	0.959473
PCDHGA2	106	3176	0.002342	0.008784	0.7897	0.959473
PYGL	59	1950	0.002852	0.01102	0.7958	0.96082
TFAP2E	30	906	0.00411	0.01636	0.8017	0.96082
ABCC11	38	1391	0.00334	0.01332	0.8019	0.96082
GRM6	61	1699	0.0029	0.01186	0.8068	0.96082
ACACB	40	1305	-0.003255	0.01345	0.8087	0.96082
DNAH8	31	932	0.003797	0.01601	0.8126	0.96082
LAMA1	31	1094	-0.003494	0.01481	0.8134	0.96082
NPC1	34	1136	0.003378	0.01432	0.8135	0.96082
TKTL2	27	840	0.003533	0.01521	0.8163	0.96082
SCN1A-AS1	50	1576	0.00279	0.01226	0.82	0.96082
LILRA2	27	879	0.003651	0.01659	0.8258	0.96082
ABCA8	33	1039	0.003293	0.0151	0.8274	0.96082
ATP2C2	43	1254	0.002912	0.01361	0.8305	0.96082
TFB1M	32	926	0.003426	0.01605	0.8309	0.96082
TMPRSS7	32	1026	0.003261	0.0154	0.8322	0.96082
MYO18A	27	770	-0.003586	0.01711	0.834	0.96082
NPHP4	41	1376	0.002776	0.01329	0.8346	0.96082
STOX1	27	845	0.003404	0.01707	0.8419	0.96338
MAN2B2	32	1056	0.002852	0.01498	0.849	0.96338
CLN6	29	1026	-0.002761	0.0153	0.8568	0.96338
PDPR	49	1477	0.002293	0.01276	0.8574	0.96338
MASP2	34	1042	0.002702	0.01511	0.858	0.96338
COL24A1	33	1136	-0.002548	0.01448	0.8603	0.96338
TAP1	45	1402	-0.001785	0.01018	0.8608	0.96338
SUMF1	28	1006	0.002717	0.01564	0.8621	0.96338
SOX8	26	908	0.002727	0.01571	0.8622	0.96338
ACADSB	53	1791	0.002011	0.01182	0.8649	0.96338
TTC28	44	1317	0.002223	0.01316	0.8659	0.96338
MFSD12	28	997	-0.002499	0.01526	0.8699	0.96338
SEC24D	33	1031	0.00249	0.01526	0.8704	0.96338
COX10	32	1112	-0.002264	0.01486	0.8789	0.967854
KRT75	58	1832	0.0016	0.01062	0.8803	0.967854
EPX	41	1308	-0.001986	0.01352	0.8832	0.967854
IRF2	28	900	-0.002226	0.01551	0.8859	0.967854
TTC28-AS1	29	787	0.002379	0.01743	0.8914	0.967854
MUC12	26	905	0.002155	0.01595	0.8925	0.967854
FLNC	29	944	-0.002097	0.01592	0.8952	0.967854
SVEP1	64	2130	0.001404	0.01066	0.8952	0.967854
ABCB6	80	2453	0.001219	0.009861	0.9016	0.971956
BCO1	27	917	-0.001749	0.01616	0.9138	0.975458
ADAMTS14	27	920	0.001664	0.01621	0.9182	0.975458
CAPN3	34	1151	-0.00147	0.01447	0.9191	0.975458
DNAH7	42	1315	-0.001353	0.01347	0.9199	0.975458
KRT16	26	895	0.001639	0.01634	0.9201	0.975458
FER1L6	52	1559	-0.001199	0.0124	0.923	0.975458
ACTBL2	39	1295	0.001255	0.01368	0.9269	0.975458
ABCC1	48	1438	0.001142	0.01281	0.929	0.975458
DPYD	42	1291	0.001198	0.01351	0.9293	0.975458
H6PD	26	902	-0.001407	0.01624	0.931	0.975458
PAPSS2	44	1627	-0.0009511	0.0122	0.9378	0.978216
PRKRA	39	1190	-0.001038	0.01371	0.9397	0.978216
CERCAM	30	854	0.001213	0.01652	0.9415	0.978216
PABPC1	35	1153	-0.0009297	0.0138	0.9463	0.980472
ABCB5	44	1482	-0.0007323	0.0126	0.9537	0.985402
NPHP3-ACAD11	64	2014	-0.0004492	0.01096	0.9673	0.986736
CBWD5	39	1377	-0.0004836	0.01271	0.9697	0.986736
SLC26A11	34	1085	-0.0005	0.01376	0.971	0.986736
TGM6	38	1158	0.0005045	0.01446	0.9722	0.986736
FOXD4L4	37	1199	-0.0004893	0.01419	0.9725	0.986736
MYHAS	244	7271	-0.0001529	0.005217	0.9766	0.986736
ABCC2	49	1710	-0.0003505	0.012	0.9767	0.986736
EPPK1	47	1439	0.0003612	0.01298	0.9778	0.986736
ABCC6	46	1447	0.0003408	0.01285	0.9788	0.986736
PRKN	42	1423	-0.000265	0.01306	0.9838	0.989104
IQCA1	37	1342	-9.96e-05	0.01339	0.9941	0.996772
PCDHGA3	96	2947	1.89e-05	0.009078	0.9983	0.9983
