# Supplementary material for: Gene burden analysis identifies genes associated with increased risk and severity of adult-onset hearing loss in a diverse hospital-based cohort
Source: PLoS Genet. 2023 Jan 19;19(1):e1010584. doi: 10.1371/journal.pgen.1010584 (PMC9888707; doi:10.1371/journal.pgen.1010584)
Supplement: S7 Table — [8]. (XLSX) [file pgen.1010584.s007.xlsx]

## Sheet: ST7
Supplementary Table 7: Attempted replication results for associations from Praveen et al.
CHROM	POS	ID	PMBB_MAF	PMBB_BETA	PMBB_SE	PMBB_P	Direction_match	Regen_AF	Regen_OR	Regen_direction	Regen_P	Regen_meta_alldir
22	37726115	chr22:37726115:T:C	0.351955	0.0129027	0.00400578	0.00127844	Yes	0.4487	1.045	+	8.39e-19	+++-+
10	71617355	chr10:71617355:G:A	0.0112438	0.0527732	0.0175059	0.00257505	Yes	0.0111	1.188	+	8.16e-13	-++++
10	125123701	chr10:125123701:C:T	0.244224	0.0113485	0.00453084	0.0122588	Yes	0.2673	1.061	+	1.23e-25	+++++
1	205751355	chr1:205751355:G:A	0.47505	-0.00911385	0.00388357	0.0189423	Yes	0.5493	0.971	-	1.99e-09	+----
15	88708947	chr15:88708947:C:G	0.190845	-0.0104106	0.00479909	0.0300675	Yes	0.2232	0.956	-	1.15e-13	-----
6	158077058	chr6:158077058:T:C	0.544022	-0.00811185	0.00378085	0.0319187	No	0.5178	1.04	+	1.35e-15	+++++
2	54590546	chr2:54590546:A:G	0.446175	-0.00812499	0.00379349	0.0322143	Yes	0.4927	0.963	-	2.06e-14	-----
11	89284793	chr11:89284793:G:A	0.219415	0.00989349	0.00463076	0.0326475	Yes	0.2931	1.052	+	3.09e-20	+++-+
10	62079658	chr10:62079658:T:C	0.345778	-0.0080775	0.00400663	0.0438037	Yes	0.4195	0.967	-	3.3e-11	+----
16	55456852	chr16:55456852:T:A	0.185583	-0.00904501	0.00478971	0.058977	Yes	0.2034	0.967	-	3.88e-08	+----
6	83697747	chr6:83697747:C:T	0.351059	0.00676603	0.00403332	0.0934466	Yes	0.434	1.035	+	3.58e-12	-++-+
6	43360012	chr6:43360012:A:G	0.466149	0.00662771	0.00402861	0.0999459	Yes	0.5992	1.057	+	7.96e-28	+++++
11	69208057	chr11:69208057:T:C	0.669615	0.00630164	0.00395556	0.111144	Yes	0.6182	1.03	+	5.43e-09	-++-+
7	138802165	chr7:138802165:CA:C	0.600312	-0.00605596	0.00385817	0.116506	No	0.6147	1.035	+	1.17e-10	?++??
11	118609508	chr11:118609508:T:C	0.415445	0.00608895	0.00389789	0.11827	Yes	0.3464	1.041	+	3.59e-13	+++-?
22	50549676	chr22:50549676:G:A	0.0325369	-0.0167162	0.0108896	0.124777	No	0.0418	1.138	+	4.24e-26	+++-+
17	81711135	chr17:81711135:C:T	0.0128275	0.0233211	0.0165773	0.159493	Yes	0.0117	1.14	+	1.55e-08	+++-+
18	6678716	chr18:6678716:T:A	0.475111	0.00506791	0.0038273	0.185462	Yes	0.4901	1.031	+	4.29e-10	+++++
4	17529069	chr4:17529069:T:A	0.106781	-0.00723922	0.00609741	0.235132	No	0.1351	1.049	+	3.91e-10	-+-+?
6	32422420	chr6:32422420:A:G	0.0167019	0.0150294	0.0149473	0.314667	Yes	0.0206	1.159	+	8.31e-22	+++++
14	52048541	chr14:52048541:T:G	0.568578	0.00369548	0.00375014	0.324422	No	0.5844	0.963	-	7.85e-14	+----
10	93017351	chr10:93017351:A:G	0.588019	0.00386794	0.00404504	0.338969	No	0.4821	0.965	-	7.29e-13	-----
8	73332501	chr8:73332501:T:C	0.204781	0.00393584	0.00462151	0.394422	Yes	0.1972	1.035	+	2.59e-08	-++++
18	54968860	chr18:54968860:T:C	0.175831	0.00406116	0.00499955	0.416623	Yes	0.2152	1.037	+	1.95e-09	-++++
17	2671527	chr17:2671527:G:A	0.461266	-0.00272405	0.00388295	0.48297	Yes	0.5034	0.966	-	4.62e-11	+---?
6	133468590	chr6:133468590:G:A	0.374978	0.00271342	0.00389453	0.48598	Yes	0.3211	1.042	+	7.72e-15	+++-+
5	73777790	chr5:73777790:T:C	0.596061	0.00267476	0.00391552	0.494538	Yes	0.5332	1.055	+	2.46e-27	+++-+
19	2390522	chr19:2390522:C:T	0.216409	0.00257253	0.00465999	0.580919	No	0.2701	0.966	-	2.85e-09	+---?
13	20186225	chr13:20186225:A:T	0.0167371	-0.00721772	0.0148843	0.627734	No	0.0178	1.114	+	1.4e-08	+++-+
7	50785454	chr7:50785454:C:T	0.620042	-0.00196692	0.00433911	0.650335	No	0.7335	1.039	+	5.59e-12	+++++
11	8077642	chr11:8077642:C:T	0.636055	0.00165392	0.0038272	0.665635	Yes	0.6401	1.029	+	3.32e-08	-++-+
12	109460927	chr12:109460927:A:G	0.529079	0.00155667	0.00378922	0.681211	Yes	0.4468	1.033	+	4.11e-11	-++++
16	53777876	chr16:53777876:A:G	0.342548	-0.00140079	0.00406755	0.730561	Yes	0.3972	0.97	-	1.67e-09	+----
2	207194916	chr2:207194916:C:A	0.450075	-0.000841867	0.0038424	0.826574	Yes	0.547	0.969	-	3.78e-10	+----
17	7213534	chr17:7213534:C:A	0.555126	0.000767148	0.00380595	0.840258	No	0.5881	0.966	-	1.03e-11	-----
3	121996585	chr3:121996585:T:C	0.754894	-0.000876535	0.00441873	0.842758	Yes	0.7252	0.955	-	2.05e-16	-----
1	88282464	chr1:88282464:G:A	0.659888	-0.000766714	0.00410861	0.851966	No	0.7145	1.036	+	1.56e-10	-++++
20	62819980	chr20:62819980:C:T	0.0456603	-0.00118534	0.00931946	0.898791	No	0.0654	1.062	+	1.6e-09	+++++
11	8035366	chr11:8035366:A:G	0.206237	0.000582094	0.00458882	0.899059	No	0.1932	0.952	-	3.58e-15	---+-
21	42388983	chr21:42388983:C:T	0.0378763	-0.000964769	0.00973477	0.921055	No	0.0549	1.07	+	4.05e-10	+++++
13	75783745	chr13:75783745:C:G	0.441592	-0.000319527	0.00376523	0.932371	No	0.4275	1.031	+	1.07e-09	+++++
10	124938711	chr10:124938711:T:C	0.629075	-0.000266624	0.00433143	0.950917	Yes	0.7564	0.964	-	1.3e-08	?--??
10	78760556	chr10:78760556:T:C	0.218256	0.00026504	0.00447908	0.952815	No	0.2162	0.959	-	7.14e-12	+----
1	165139894	chr1:165139894:C:T	0.362088	0.000228056	0.00401954	0.954755	Yes	0.4422	1.028	+	4.21e-08	+++-+
5	2560118	chr5:2560118:A:G	0.12984	0.000128966	0.00549407	0.981273	Yes	0.114	1.047	+	2.24e-09	-++++
